# Supplementary material for: Spontaneously Ruptured Dermoid Cysts and Their Potential Complications: A Review of the Literature with a Case Report
Source: Hindawi journal article supplement (doi:10.1155/2020/6591280), 2020-01-01
Supplement: f1 [file 6591280.f1.pdf]

| Author                         | Age | Size (measured at its biggest, rounded to nearest cm)                   | Gravidity, Parity, Menopausal status if known | Symptoms                                                       | Cause of ruptured dermoid cyst         | Management                                 | Complications                                                                  |
|--------------------------------|-----|-------------------------------------------------------------------------|-----------------------------------------------|----------------------------------------------------------------|----------------------------------------|--------------------------------------------|--------------------------------------------------------------------------------|
| 1. Piper, 1941                 | 50  | 12                                                                      | Post-menopausal                               | Abdominal pain, mass sensation, weight loss                    | Fall                                   | Laparotomy                                 |                                                                                |
| 2. Piper, 1941                 | 60  | No mention                                                              | Post-menopausal                               | Abdominal pain, distension, nausea, vomiting, fever, diarrhoea | Fall                                   | Laparotomy                                 | Chronic peritonitis                                                            |
| 3. Poole, 1947                 | 64  | 14                                                                      | Post-menopausal                               | Abdominal pain, vomiting, diarrhoea, fevers                    |                                        | Laparotomy                                 |                                                                                |
| 4. Van Orman and Mautner, 1951 | 25  | 25, 5 (Bilateral – does not mention if smaller one was ruptured or not) | G1P1, Pre-menopausal                          | Abdominal pain, mass, distension, constipation                 | Postpartum                             | Laparotomy                                 | Granulomatous peritonitis                                                      |
| 5. Quer, 1952                  | 24  | 8                                                                       | G1P1, Pre-menopausal                          | Abdominal pain, distension and vomiting                        | Immediately postpartum                 | Laparotomy                                 |                                                                                |
| 6. Kistner et al, 1952         | 48  | 15 (Bilateral, Left 6cm does not mention if this ruptured)              | G1P1                                          | Abdominal pain, fevers, jaundice                               |                                        | Laparotomy                                 | Granulomatous peritonitis                                                      |
| 7. Kistner et al, 1952         | 31  | 8                                                                       | G3P2, Pre-menopausal                          | Abdominal pain, nausea, vomiting                               | 32 weeks pregnant, torsion             | Laparotomy                                 | Paralytic ileus                                                                |
| 8. Stein and Kaye, 1954        | 31  | No mention                                                              | G2P2, Pre-menopausal                          | Pelvic mass, rectal pain, weight loss, low grade fever         |                                        | Laparotomy                                 | Granulomatous peritonitis, fevers                                              |
| 9. Abitbol, 1959               | 34  | No mention                                                              | G2P1, Pre-menopausal                          | Abdominal pain, distension, fever, vomiting                    |                                        | Laparotomy                                 | Paralytic ileus                                                                |
| 10. Abitbol, 1959              | 45  | 10                                                                      | G2P2                                          | Abdominal mass                                                 |                                        | Laparotomy                                 |                                                                                |
| 11. Waddell et al, 1961        | 22  | 6                                                                       | G3P2, Pre-menopausal                          | Abdominal pain, nausea, vomiting, diarrhoea                    | 36 weeks pregnant                      | Laparotomy                                 |                                                                                |
| 12. Schaffer et al, 1964       | 27  | 6                                                                       | G3P3, Pre-menopausal                          | Acute abdomen, fever on day 1 postpartum                       | Preterm delivery at 32 weeks gestation | Laparotomy                                 | Acute chemical peritonitis                                                     |
| 13. Jejurkar et al, 1965       | 35  | 13                                                                      | G0P0, Pre-menopausal                          | Abdominal pain, vomiting, constipation                         |                                        | Laparotomy                                 | Paralytic ileus, chemical peritonitis                                          |
| 14. Cox and Kitay, 1971        | 30  | 15                                                                      | G3P2, Pre-menopausal                          | Abdominal pain, nausea, vomiting, fevers                       | 16 weeks pregnant, torsion             | Laparotomy                                 | Ileus                                                                          |
| 15. Harris and Mackrell, 1971  | 20  | 14                                                                      | G1P1, Pre-menopausal                          | Abdominal distension, abdominal pain, fevers                   | 4 days postpartum                      | Laparotomy                                 | Chemical peritonitis, ileus, wound seroma                                      |
| 16. Lee and Yeung, 1971        | 36  | No mention                                                              | G3P2, Pre-menopausal                          | Acute abdomen, fevers, vomiting                                | 32 weeks pregnant, infection           | Laparotomy and classical caesarean section | Bowel perforation of sigmoid colon, ileus, subphrenic abscess, wound infection |

|                          |    |                                                                                                      |                        |                                                                                                                   |                              |                                                 |                                                                                                                        |
|--------------------------|----|------------------------------------------------------------------------------------------------------|------------------------|-------------------------------------------------------------------------------------------------------------------|------------------------------|-------------------------------------------------|------------------------------------------------------------------------------------------------------------------------|
| 17. Panjota et al, 1975  | 15 | No mention                                                                                           | G1P0, Pre-menopausal   | Severe shock and collapse                                                                                         | Labour                       | Laparotomy                                      | Haemorrhage from liver laceration and rupture of uterine vessels, cardiac arrest during surgery, death                 |
| 18. Waxman, 1976         | 41 | 10, 7 (Bilateral – Left 7cm unruptured, ruptured dermoid cyst intra-operatively was found to be 7cm) | G6P6, Pre-menopausal   | Abdominal distension, fever, shortness of breath                                                                  |                              | Laparotomy                                      |                                                                                                                        |
| 19. Waxman, 1976         | 22 | 15                                                                                                   | G0P0, Pre-menopausal   | Abdominal mass, distension, pain                                                                                  | Torsion                      | Laparotomy                                      | Re-admitted with inflammatory dermoid mass recurrence as seen on imaging, ascites which was aspirated                  |
| 20. Waxman, 1976         | 53 | No mention                                                                                           | G0P0, Post-menopausal  | Abdominal pain                                                                                                    |                              | Laparotomy                                      | Granulomatous peritonitis                                                                                              |
| 21. Mehra et al, 1976    | 18 | 8, 8 (Bilateral – both ruptured)                                                                     | G1P0, Pre-menopausal   | Acute abdomen, nausea, vomiting, fever, vaginal discharge                                                         | 12 weeks pregnant, infection | Laparotomy                                      | Subphrenic abscess                                                                                                     |
| 22. Semchyshyn, 1977     | 45 | 15                                                                                                   | Pre-menopausal         | Abdominal pain, shortness of breath                                                                               |                              | Laparotomy                                      |                                                                                                                        |
| 23. Giustini et al, 1978 | 18 | No mention                                                                                           | G1P0, Pre-menopausal   | Abdominal pain, fevers                                                                                            | Termination of pregnancy     | Laparotomy                                      |                                                                                                                        |
| 24. Stern, 1981          | 21 | 27                                                                                                   | G0P0, Pre-menopausal   | Abdominal distension, weight loss, loss of appetite, fever, nausea and vomiting, discharge of hair from umbilicus |                              | Laparotomy                                      | Bowel obstruction, Abdominal wall sinus                                                                                |
| 25. Stern, 1981          | 29 | 13, 6 (Bilateral – the smaller one did not rupture)                                                  | G1P1, Pre-menopausal   | Abdominal pain, distension                                                                                        |                              | Laparotomy                                      |                                                                                                                        |
| 26. Stern, 1981          | 74 | No mention                                                                                           | G12P6, Post-menopausal | Abdominal pain, distension, fever                                                                                 |                              | Laparotomy                                      | Chemical peritonitis                                                                                                   |
| 27. Stern, 1981          | 41 | 8                                                                                                    | Pre-menopausal         | Abdominal pain, fever, diarrhoea                                                                                  |                              | Laparotomy                                      | Ileus, pelvic abscess, then sepsis and death of Day 2 post-operatively from cardiac arrest                             |
| 28. Longmaid et al, 1983 | 32 | 6                                                                                                    | G2P1, Pre-menopausal   | Back pain, fevers, nausea, vomiting, pre-term labour                                                              | 28 weeks pregnant            | Emergency caesarean section for foetal distress | Chemical peritonitis, ileus                                                                                            |
| 29. Stuart et al, 1983   | 60 | 15                                                                                                   | Post-menopausal        | Abdominal pain, diarrhoea, vomiting, low grade fever                                                              |                              | Laparotomy                                      | Dermoid mass recurrence needing second laparotomy, chronic granulomatous peritonitis needing oral steroids for 6 weeks |
| 30. Stuart et al, 1983   | 47 | 4                                                                                                    | G0P0                   | Abdominal distension, weight gain                                                                                 |                              | Laparotomy                                      | Granulomatous peritonitis                                                                                              |

|                                      |    |            |                       |                                                                  |                                                |            |                                                                                                                                                                                                                                           |
|--------------------------------------|----|------------|-----------------------|------------------------------------------------------------------|------------------------------------------------|------------|-------------------------------------------------------------------------------------------------------------------------------------------------------------------------------------------------------------------------------------------|
| 31. Fukushima et al, 1984            | 28 | 20         | G3P3, Pre-menopausal  | Abdominal distension, mass sensation                             | 3 months postpartum                            | Laparotomy |                                                                                                                                                                                                                                           |
| 32. Graubard and Koller, 1987        | 44 | 16         | -                     | Abdominal pain, distension, fever                                | Infection – Group B strep, Torulopsis glabrata | Laparotomy |                                                                                                                                                                                                                                           |
| 33. Payne-James and Fitzgibbon, 1987 | 29 | 5          | P2, Pre-menopausal    | Abdominal pain, nausea                                           |                                                | Laparotomy |                                                                                                                                                                                                                                           |
| 34. Ferrero et al, 1990              | 19 | No mention | Pre-menopausal        | Abdominal pain, haematuria                                       | MVA                                            | Laparotomy | Acute chemical peritonitis                                                                                                                                                                                                                |
| 35. Holdsworth et al, 1990           | 28 | 11         | Pre-menopausal        | Abdominal pain                                                   |                                                | Laparotomy |                                                                                                                                                                                                                                           |
| 36. Kommos et al, 1990               | 51 | 4          | G3P3, Post-menopausal | Abdominal pain, mass, fever                                      |                                                | Laparotomy | Recurrent dermoid masses 17 years as seen on CT later near liver and another mass perforating into the transverse colon needing second laparotomy with liver resection and 7cm segmental transverse colectomy with end-to-end anastomosis |
| 37. Levine et al, 1992               | 26 | 8          | Pre-menopausal        | Syncope, abdominal pain                                          | MVA                                            | Laparotomy | Haemorrhage from avulsion of the ovarian pedicle                                                                                                                                                                                          |
| 38. Sharma and Pendse, 1992          | 35 | No mention | Pre-menopausal        | Abdominal mass                                                   |                                                | Laparotomy |                                                                                                                                                                                                                                           |
| 39. Sharma and Pendse, 1992          | 22 | No mention | Pre-menopausal        | Abdominal pain, distension, constipation, vomiting               |                                                | Laparotomy | Bowel perforation in terminal ileum from dissection of dermoid adhesions                                                                                                                                                                  |
| 40. Sharma and Pendse, 1992          | 52 | No mention | -                     | Abdominal pain, distension, constipation                         |                                                | Laparotomy | Acute abdomen post-op from bowel perforation needing second laparotomy (undetected in first laparotomy for dermoid)                                                                                                                       |
| 41. Sharma and Pendse, 1992          | 56 | No mention | -                     | Abdominal pain, distention, vomiting                             |                                                | Laparotomy |                                                                                                                                                                                                                                           |
| 42. Bhatla et al, 1993               | 45 | 14         | P4, Pre-menopausal    | Abdominal distension, pain, change in bowel habits, constipation |                                                | Laparotomy |                                                                                                                                                                                                                                           |
| 43. Pal et al, 1996                  | 30 | 12         | Pre-menopausal        | Fevers, abdominal pain, distension, vomiting, constipation       |                                                | Laparotomy | Wound infection with dehiscence requiring secondary suture                                                                                                                                                                                |
| 44. Stenram, 1997                    | 52 | 7          | P3, Pre-menopausal    | Abdominal pain, distension                                       |                                                | Laparotomy | Sclerosing peritonitis                                                                                                                                                                                                                    |

|                                  |    |                                                   |                       |                                                              |                                                                                                          |                                                  |                                                                                                                                       |
|----------------------------------|----|---------------------------------------------------|-----------------------|--------------------------------------------------------------|----------------------------------------------------------------------------------------------------------|--------------------------------------------------|---------------------------------------------------------------------------------------------------------------------------------------|
| 45. Ling et al, 1998             | 23 | No mention                                        | Pre-menopausal        | Abdominal pain, fevers                                       | Termination of pregnancy                                                                                 | Laparotomy                                       |                                                                                                                                       |
| 46. Fibus, 2000                  | 45 | 10                                                | G0P0, pre-menopausal  | Abdominal pain, irregular menses                             |                                                                                                          | Laparotomy                                       |                                                                                                                                       |
| 47. Shukunami et al, 2000        | 32 | 5                                                 | G1P1, Pre-menopausal  | Abdominal pain                                               | 5 weeks postpartum                                                                                       | Laparotomy                                       |                                                                                                                                       |
| 48. Wang et al, 2000             | 28 | 5 (Intra-operatively was found to be 4cm)         | G1P0, Pre-menopausal  | Acute abdomen                                                | Malignant transformation                                                                                 | Laparoscopy                                      | Post-operative abdominal distension, Intestinal obstruction on CT scan with ascites requiring laparotomy, disseminated carcinomatosis |
| 49. Jaworski et al, 2001         | 27 | 9                                                 | G1P1, Pre-menopausal  | Abdominal pain                                               |                                                                                                          | Laparotomy                                       | Peritoneal melanosis                                                                                                                  |
| 50. Kumari et al, 2002           | 25 | 8                                                 | G1P0, Pre-menopausal  | Labour with spontaneous rupture of membranes, abdominal pain | 39 weeks pregnant in labour – resulting in emergency caesarean section for elevated foetal scalp lactate | Emergency caesarean section                      |                                                                                                                                       |
| 51. Uysal et al, 2003            | 50 | 6                                                 | G0P0                  | Abdominal pain, nausea, vomiting                             |                                                                                                          | No mention                                       | Intra-abdominal abscess                                                                                                               |
| 52. Takemori and Nishimura, 2003 | 69 | 20                                                | G4P3, post-menopausal | Abdominal distension                                         | Malignant transformation                                                                                 | Laparotomy                                       |                                                                                                                                       |
| 53. Wilberg et al, 2003          | 50 | 10                                                | G4P3, Pre-menopausal  | Abdominal pain, distension, diarrhoea, vomiting              |                                                                                                          | Laparotomy                                       | Granulomatous peritonitis                                                                                                             |
| 54. Lichtenberg, 2004            | 22 | 10                                                | G4P3, Pre-menopausal  | Abdominal pain, mass, fevers,                                | 12 days post termination of pregnancy, infection                                                         | Laparotomy                                       | Pelvic peritonitis                                                                                                                    |
| 55. Phupong et al, 2004          | 39 | 19 (Intra-operatively was found to be 16cm)       | G0P0, Pre-menopausal  | Abdominal distension, shortness of breath                    |                                                                                                          | Laparotomy                                       | Granulomatous peritonitis                                                                                                             |
| 56. Suprasert et al, 2004        | 50 | 10                                                | G1P1, peri-menopausal | Abdominal distension, weight loss                            |                                                                                                          | Laparotomy                                       |                                                                                                                                       |
| 57. Suprasert et al, 2004        | 53 | 9, 3 (Bilateral – the smaller one was unruptured) | G4P4, Post-menopausal | Abdominal distension, weight loss, fevers                    |                                                                                                          | Laparotomy                                       | Granulomatous peritonitis                                                                                                             |
| 58. Moriaty et al, 2005          | 29 | No mention                                        | G2P1, Pre-menopausal  | Abdominal pain, PPROM, pre-term labour                       | 31 weeks pregnant                                                                                        | Emergency caesarean section for pathological CTG | Chemical peritonitis                                                                                                                  |
| 59. Roman et al, 2005            | 26 | 10                                                | G3P1, Pre-menopausal  | Abdominal pain, nausea, vomiting                             | 31 weeks pregnant, torsion                                                                               | Laparoscopy                                      |                                                                                                                                       |

|                               |    |                                             |                       |                                                                                |                                    |                                                              |                                                                          |
|-------------------------------|----|---------------------------------------------|-----------------------|--------------------------------------------------------------------------------|------------------------------------|--------------------------------------------------------------|--------------------------------------------------------------------------|
| 60. Ansell and Bolton, 2006   | 38 | 9 (intra-operatively was found to be 6cm)   | G1P0, Pre-menopausal  | Abdominal pain, vomiting, pre-term labour                                      | 36 weeks pregnant                  | Emergency caesarean for CTG abnormalities                    |                                                                          |
| 61. Nitinarvakarn et al, 2006 | 41 | 14                                          | G0P0, Pre-menopausal  | Abdominal pain, distension, nausea, vomiting, diarrhoea, fevers                |                                    | Laparotomy                                                   | Chemical peritonitis                                                     |
| 62. Banerjee, 2007            | 28 | 6                                           | P2, Pre-menopausal    | Acute abdomen, diarrhoea, fevers                                               | Infection – pseudomonas            | Laparotomy                                                   | Chronic granulomatous peritonitis                                        |
| 63. Kimbrell et al, 2007      | 18 | 15                                          | Pre-menopausal        | Abdominal pain, acute abdomen                                                  | MVA                                | Laparotomy                                                   |                                                                          |
| 64. Koshiba, 2007             | 58 | 6                                           | G3P3                  | Abdominal pain, fever                                                          |                                    | Laparotomy                                                   | Chemical peritonitis requiring oral steroids and azathioprine            |
| 65. da Silva, 2008            | 75 | 14 (intra-operatively was found to be 13cm) | G1P1, Post-menopausal | Abdominal pain                                                                 | Malignant transformation           | Laparotomy                                                   | Chemical peritonitis                                                     |
| 66. Wang et al, 2008          | 39 | 15                                          | G3P2                  | Abdominal pain                                                                 | Malignant transformation           | No mention                                                   |                                                                          |
| 67. Candela et al, 2009       | 9  | 20                                          | G0P0, Pre-menopausal  | Acute abdomen                                                                  | Torsion, 20 days post appendectomy | Laparotomy                                                   | Haemorrhage                                                              |
| 68. Chang and Lin, 2009       | 17 | 12                                          | Pre-menopausal        | Abdominal pain                                                                 | Vigorous exercise                  | Laparotomy                                                   | Bowel obstruction as seen on imaging                                     |
| 69. Iwata et al, 2009         | 9  | 3                                           | G0P0, Pre-menopausal  | Abdominal pain                                                                 |                                    | Laparoscopy                                                  |                                                                          |
| 70. Murtaza et al, 2009       | 55 | 8                                           | -                     | Abdominal pain, fever, constipation, vomiting                                  |                                    | Laparotomy                                                   | Ileus                                                                    |
| 71. Hosokawa et al, 2010      | 52 | 17 (Intra-operatively was found to be 8cm)  | -                     | Abdominal mass                                                                 | Malignant transformation           | No mention                                                   |                                                                          |
| 72. Tanaka et al, 2011        | 37 | 12                                          | Pre-menopausal        | Acute abdomen, pain, fevers                                                    | 12 days postpartum                 | Laparotomy                                                   | Uterine perforation                                                      |
| 73. Yang et al, 2011          | 50 | 4 (intra-operatively was found to be 3cm)   | G3P2                  | Abdominal pain, nausea, fevers                                                 |                                    | Laparoscopy                                                  | Ascites requiring drainage, chemical peritonitis requiring oral steroids |
| 74. Shankar et al, 2013       | 25 | 30                                          | G0P0, Pre-menopausal  | Abdominal pain, weight loss, distension, shortness of breath, irregular menses |                                    | Laparotomy                                                   | Intestinal obstruction – seen clinically                                 |
| 75. Tejima et al, 2013        | 72 | 6                                           | Post-menopausal       | Fevers, abdominal distension, pain, nausea, diarrhoea                          |                                    | Patient declined surgical management – supportive management |                                                                          |
| 76. Nader et al, 2014         | 29 | 9                                           | G2P2, Pre-menopausal  | Abdominal distension                                                           | 2 months postpartum                | Laparoscopy                                                  | Chemical peritonitis                                                     |
| 77. Erbay et al, 2015         | 54 | 10                                          | -                     | Abdominal pain                                                                 |                                    | Laparotomy                                                   | Granulomatous peritonitis                                                |

|                              |    |                                                                          |                      |                                                                |                                               |                                      |                                                                                                                                                                              |
|------------------------------|----|--------------------------------------------------------------------------|----------------------|----------------------------------------------------------------|-----------------------------------------------|--------------------------------------|------------------------------------------------------------------------------------------------------------------------------------------------------------------------------|
| 78. Kuo et al, 2015          | 31 | No mention                                                               | G1, Pre-menopausal   | Abdominal distension, weight loss                              |                                               | Laparotomy                           | Residual dermoid fat implants in subphrenic and perihepatic regions on CT scan, patient is asymptomatic                                                                      |
| 79. Joshi et al, 2016        | 26 | 9                                                                        | Pre-menopausal       | Acute abdomen, pain, vomiting                                  | Termination of pregnancy                      | Laparotomy                           |                                                                                                                                                                              |
| 80. Lim et al, 2016          | 32 | 5                                                                        | Pre-menopausal       | Abdominal pain                                                 | 15 weeks pregnant                             | Laparoscopy                          |                                                                                                                                                                              |
| 81. Haidar and Sharaf, 2017  | 45 | No mention                                                               | Pre-menopausal       | Abdominal pain                                                 | MVA                                           | Laparoscopy                          | Died from other injuries from MVA – pneumothorax, lung contusions, liver haematoma, brain contusions, developed pneumonia and renal impairment and subsequent cardiac arrest |
| 82. Yohann et al, 2017       | 15 | 4                                                                        | Pre-menopausal       | Abdominal pain                                                 | MVA                                           | Laparoscopy                          |                                                                                                                                                                              |
| 83. Chaudhary et al, 2018    | 28 | 6 (intra-operatively was 5cm)                                            | G2P1, Pre-menopausal | Abdominal pain                                                 | 24 weeks pregnant                             | Laparotomy                           | Chemical peritonitis                                                                                                                                                         |
| 84. Aydin et al, 2019        | 34 | 3                                                                        | Pre-menopausal       | Abdominal pain, loss of appetite                               | 23 weeks pregnant                             | Mini- laparotomy at McBurney's point |                                                                                                                                                                              |
| 85. Chandi et al, 2019       | 27 | 20                                                                       | G2P1, Pre-menopausal | Abdominal pain preterm labour, abdominal distension postpartum | 30 weeks pregnant, torsion                    | Laparotomy                           |                                                                                                                                                                              |
| 86. Choi et al, 2019         | 42 | 9 (Bilateral – likely both ruptured, but case report not entirely clear) | -                    | Abdominal pain, distension, fever                              | Malignant transformation – malignant melanoma | Laparotomy                           |                                                                                                                                                                              |
| 87. El Moussaoui et al, 2019 | 31 | 6 (Bilateral, other side had 2cm dermoid unruptured)                     | G0P0, Pre-menopausal | Abdominal pain, distension                                     |                                               | Laparoscopy                          | Chemical peritonitis                                                                                                                                                         |

Supplementary Table: All cases reviewed in this literature review pertaining to dermoid cysts rupturing into the peritoneal cavity.
